# Supplementary material
Source: Springer Nature journal article supplement (https://www.springermedizin.de/resource/supplementary/13054_2013_1766_MOESM6_ESM.pdf/9711630)

# Anti-PD-1/PD-L1 Increase IFN- $\gamma$ (two-hit)

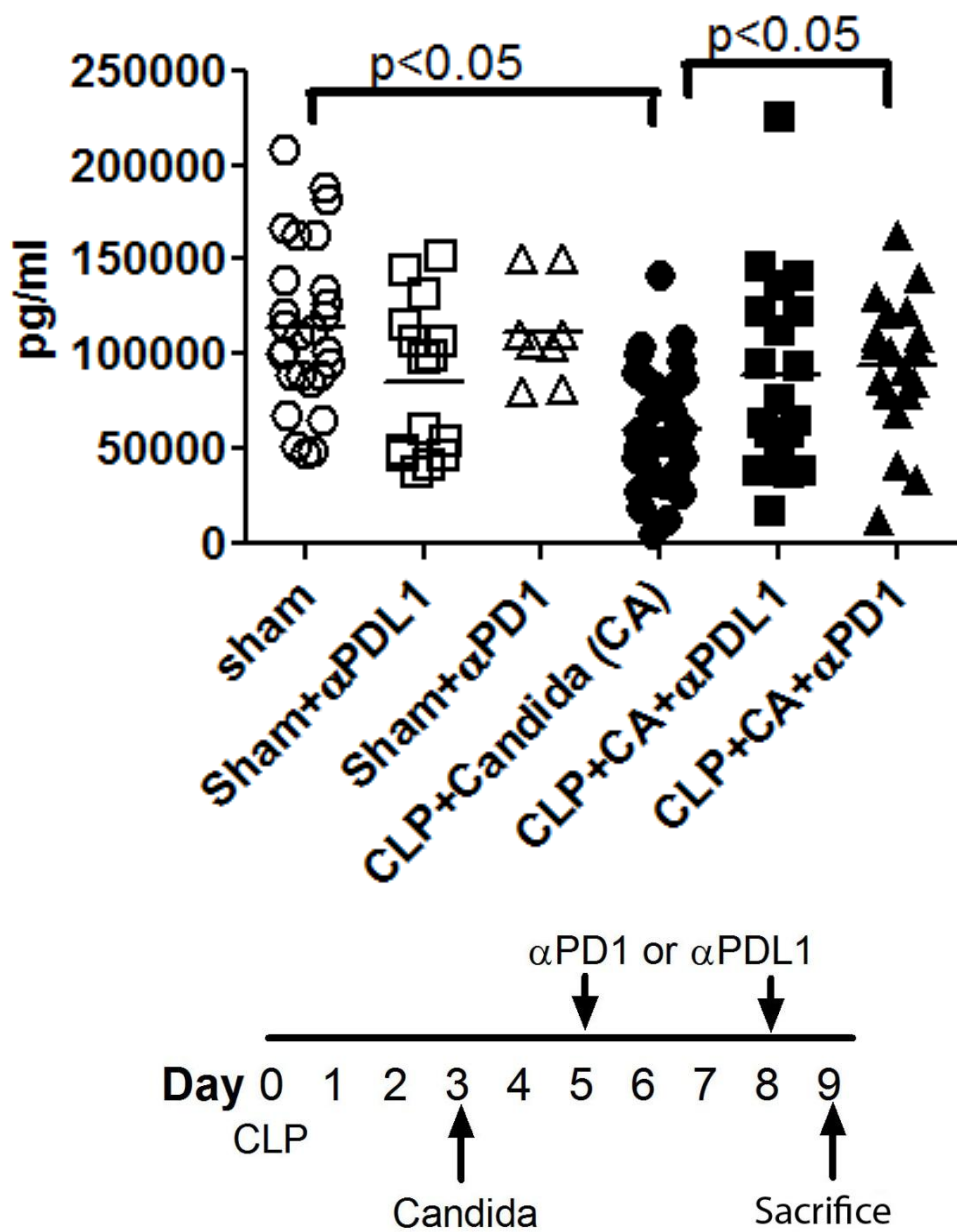

Supplement: MOESM6 [file 9711630]
